# Supplementary material
Source: Springer Nature journal article supplement (https://www.springermedizin.de/resource/supplementary/12889_2014_7452_MOESM2_ESM.pdf/9497418)

# Meta Analysis

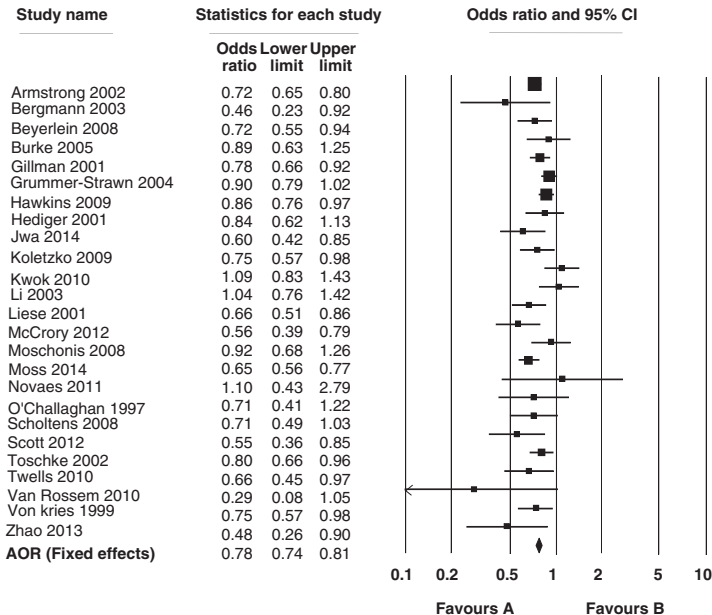

0.1    0.2    0.5    1    2    5    10

**Favours A**                      **Favours B**

Supplement: MOESM2 [file 9497418]
